# Supplementary material
Source: publisher figshare collection journal article supplement (https://acs.figshare.com/ndownloader/files/5105545)
Supplement: Supplementary file 1 [file 5105545]

## **SUPPORTING INFORMATION**

**AUTHORS:** Jennie R. Christensen, Misty MacDuffee, Robie W. Macdonald, Michael Whiticar & Peter S. Ross

**TITLE:** Persistent Organic Pollutants in British Columbia Grizzly Bears: The Consequence of Divergent Diets

**Number of Pages:** 1

**Number of Tables:** 1

**Table S1. Supporting Information.** Example of how we estimated the proportion of a contaminant concentration in a grizzly bear that is attributed to salmon consumption.  $\Sigma$ DDT and stable isotope data from bear #6 (5 year old, maritime, male grizzly bear) are used as a model. Bear #6 contained 11,100 ng/kg  $\Sigma$ DDT ( $[\Sigma\text{DDT}]_{\text{TOTAL}}$ ), while our baseline herbivore bear (#1) contained 31.727 ng/kg ( $[\Sigma\text{DDT}]_{\text{BASELINE}}$ ). See text for equations.

| Equation (Eq.#) and variable                | Solving                                                                              | Calculated Values                        | Meaning of value obtained                                                                                                |
|---------------------------------------------|--------------------------------------------------------------------------------------|------------------------------------------|--------------------------------------------------------------------------------------------------------------------------|
| (3) $\Delta\delta^{15}N_{\text{SEG}}$       | (11.6–3.5),<br>(14.1–3.5),<br>(14.4–3.5),<br>(14.0–3.5),<br>(13.2–3.5),<br>(9.3–3.5) | =8.1, 10.6, 10.9, 10.5,<br>9.7 and 5.8 ‰ | Deviation from an herbivorous (100% plant) diet for the bear, using $\delta^{15}\text{N}$ values in each segment of hair |
| (4) $\Sigma\Delta\delta^{15}N_{\text{SEG}}$ | 8.1+10.6+10.9+<br>10.5+9.7+5.8                                                       | =55.6 ‰                                  | Cumulative deviation from an herbivorous diet over a four month period                                                   |
| (7) $P_{\text{MEAT}}$                       | 55.6/91.8                                                                            | =0.61                                    | Proportion of diet consisting of salmon (based on Chinook Equivalency index)                                             |
| (8) $P_{\text{VEG}}$                        | 1.0–0.61                                                                             | =0.39                                    | Proportion of diet consisting of vegetation                                                                              |
| (9) $[\Sigma\text{DDT}]_{\text{VEG}}$       | 0.39(31.727)                                                                         | =12 ng/kg                                | Concentration of $\Sigma$ DDT attributed to vegetation                                                                   |
| (10) $[\Sigma\text{DDT}]_{\text{MEAT}}$     | 11,100–12.374                                                                        | =11,088 ng/kg                            | Concentration of $\Sigma$ DDT attributed to salmon                                                                       |
| (11) $P_{[\Sigma\text{DDT}]}$               | 11,088/11,100                                                                        | =0.99                                    | Proportion of $\Sigma$ DDT attributed to salmon                                                                          |
